# Supplementary material
Source: PubMed Central journal article supplement (PMC2955097)
Supplement: 1008242107_pnas.1008242107_SI.pdf [file 1008242107_pnas.1008242107_SI.pdf]

# Supporting Information

Tait et al. 10.1073/pnas.1008242107

## SI Text

**Isothermal Titration Calorimetry and Circular Dichroism.** For ITC, samples were dialyzed twice into filtered and degassed sample buffer (10 mM Tris pH 6.5, 50 mM KCl). eIF4E was concentrated using Sartorius Vivaspin 6-mL concentrators (10 kD  $M_r$  cutoff). Samples were clarified by centrifuging at full speed for 1 min in a benchtop centrifuge. ITC was performed on a VP-ITC machine (MicroCal) using 10  $\mu$ M of purified eIF4E and 100–300  $\mu$ M of peptide. CD measurements were performed using a Jasco J-810 spectropolarimeter.

**NMR.** All  $^{15}\text{N}$ - $^{13}\text{C}$ -labeled peptides were resuspended in 50 mM KCl, 10 mM Tris-d11, pH 6.5. Experiments were performed at 25 °C using 500- and 700-MHz Bruker spectrometers equipped with cryoprobes. Backbone assignments were done via  $^1\text{H}\{-^{15}\text{N}\}$  HSQC, HNC $\alpha$  nuclei triple resonance experiment, HNC $\alpha$ C $\beta$  nuclei triple resonance experiment (HNCACB), and C $\beta$ C $\alpha$ CONH nuclei triple resonance experiment (CBCACONH).  $^3J_{\text{NH-H}\alpha}$  coupling constants (3D-HNHA; ref. 1) were measured using eight transients, and calculated from cross-peak/diagonal peak ratios. Twenty-five micromolar [ $^{15}\text{N}$ ,  $^{13}\text{C}$ ] peptides (WT and phosWT) in 50 mM KCl, 10 mM [U-2H] Tris, pH 6.5 was used for recording the  $^1\text{H}$ - $^{15}\text{N}$  HSQC spectra of the complex with 25  $\mu$ M of unlabeled eIF4E using 256 transients. The  $^1\text{H}$  chemical shifts were referenced to water at 4.75 ppm (at 25 °C), and the  $^{13}\text{C}$  and  $^{15}\text{N}$  chemical shifts were referenced indirectly using the  $\gamma^{13}\text{C}/\gamma^1\text{H}$  and  $\gamma^{15}\text{N}/\gamma^1\text{H}$  ratios, respectively. All spectra were processed using nmrPipe, visualized with nmrDraw (2) and analyzed using NMRView (3). The chemical shift difference between the WT and mutants (M60E and R63Q), and phosphorylated WT were calculated using the equation  $\sqrt{(\Delta\delta_{\text{HN}})^2 + (0.25 * \Delta\delta_{\text{N}})^2}$ , where  $\Delta\delta_{\text{HN}}$  and  $\Delta\delta_{\text{N}}$  are the changes in the chemical shifts of  $^1\text{H}$  and  $^{15}\text{N}$  dimension, plotted against residue number.

**Modeling Procedures.** Swiss PDB Viewer (4) was used to add V67 for sequence visualization in the context of the available structure (PDB ID code 1wkx; ref. 5). Molecular graphics images were constructed using PyMOL (<http://www.pymol.org>). Calculations of charge interactions between a modeled phosphorylated S65 of 4E-BP1, and acidic groups in eIF4E, followed previously reported methodology (6). A charge of  $-2e$  was placed on the OG atom of serine, and electrostatic interactions were computed using Debye–Huckel and finite difference Poisson–Boltzmann methods.

1. Vuister G, Bax A (1993) Quantitative J correlation: A new approach for measuring homonuclear three-bond  $J(\text{H}^{\text{N}}\text{H}^{\alpha})$  coupling constants in  $^{15}\text{N}$  enriched proteins. *J Am Chem Soc* 115:7772–7777.
2. Delaglio F, et al. (1995) NMRPipe: A multidimensional spectral processing system based on UNIX pipes. *J Biomol NMR* 6:277–293.
3. Johnson BA (2004) Using NMRView to visualize and analyze the NMR spectra of macromolecules. *Methods Mol Biol* 278:313–352.

4. Guex N, Peitsch MC (1997) SWISS-MODEL and the Swiss-PdbViewer: An environment for comparative protein modelling. *Electrophoresis* 18:2714–2723.
5. Tomoo K, et al. (2005) Structural basis for mRNA cap-binding regulation of eukaryotic initiation factor 4E by 4E-binding protein, studied by spectroscopic, X-ray crystal structural, and molecular dynamics simulation methods. *Biochim Biophys Acta* 1753:191–208.
6. Kitchen J, Saunders RE, Warwicker J (2008) Charge environments around phosphorylation sites in proteins *BMC Struct Biol* 8:19.

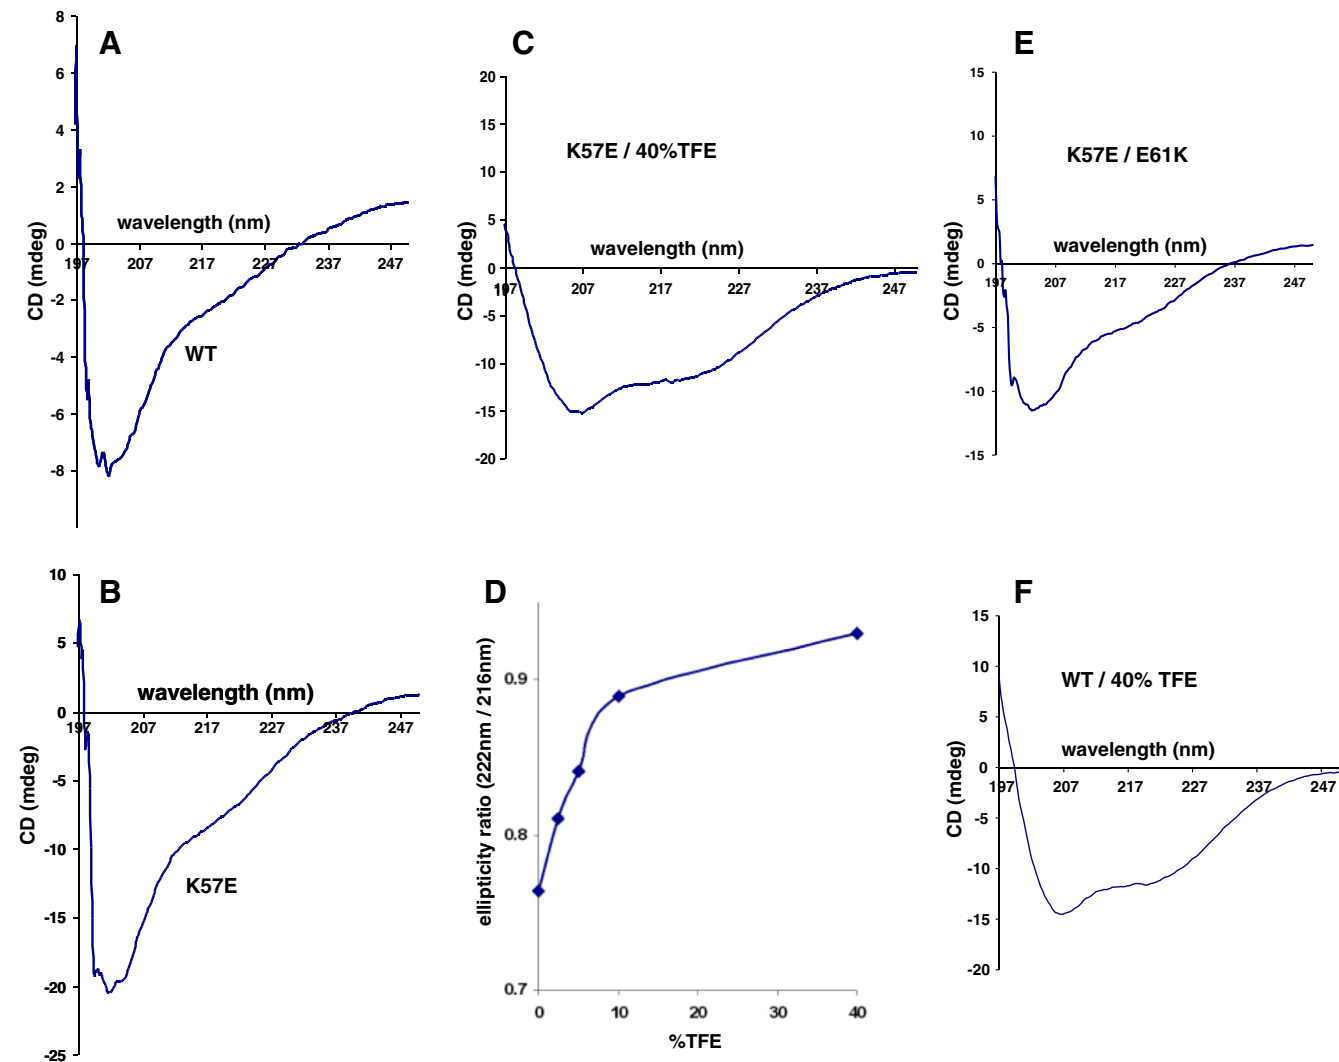

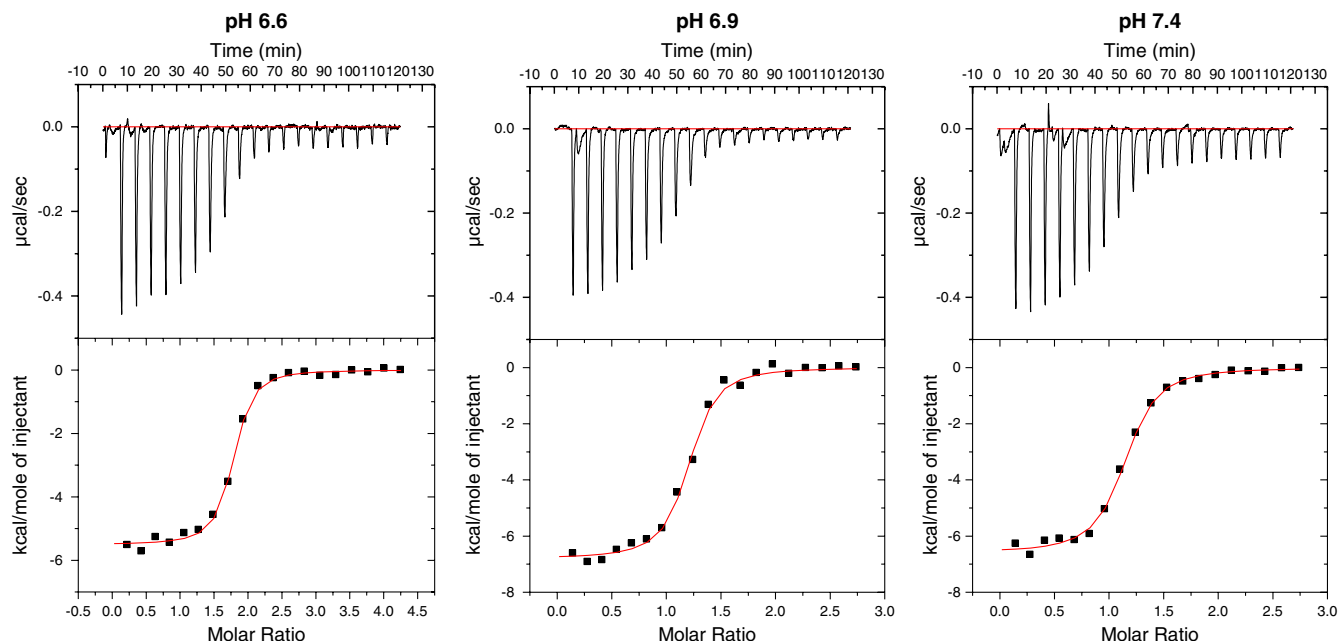

**Fig. S2.** Isothermal titration calorimetry titrations performed as in Fig. 1 at three different pH values. 4E-BP1<sub>51-67</sub> phosphorylated on S65 was titrated against wild-type eIF4E.

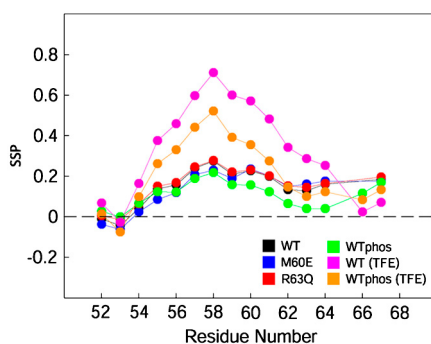

**Fig. S3.** Secondary structure propensity (SSP) values were calculated for single residues based on  $C\alpha$ ,  $C\beta$ , and  $H\alpha$  chemical shifts in the  $^{13}C$ ,  $^{15}N$ -labeled 4E-BP1<sub>51-67</sub> peptides according to the procedure outlined in ref. 1. Positive and negative values indicate propensity to form  $\alpha$ -helical and  $\beta$ -sheet structures, respectively. The propensity of WT to form  $\alpha$ -helix is marginally higher than that of phosphorylated WT (in the absence of TFE; compare black and green). However, the propensity values are significantly different in the presence of TFE (compare magenta and orange), supporting our hypothesis that WT has higher probability to form helix upon interaction with eIF4E.

1. Marsh J, Singh K, Zongchao J, Forman-Kay, JD (2006) Sensitivity of secondary structure propensities to sequence differences between  $\alpha$ - and  $\gamma$ -synuclein: Implications for fibrillation. *Protein Sci* 15:2795–2804.

4 of 5

**Table S1.  $J_{\text{HN-H}\alpha}$  values calculated using the 3JHNH $\alpha$  coupling constant (HNHA) experiment for WT, M60E, R63Q mutants and phosphorylated WT 4E-BP1<sub>51-67</sub>**

| Residue | WT  | WT (40% TFE) | M60E    | R63Q    | WTphos | Wtphos (40% TFE) |
|---------|-----|--------------|---------|---------|--------|------------------|
| I52     | —   | —            | —       | —       | 8.4    | —                |
| I53     | 9.1 | 8.0          | 8.9     | 9.1     | 8.9    | 9.1              |
| Y54     | 7.9 | 7.5          | 8.0     | 8.3     | 8.3    | 8.2              |
| D55     | 7.4 | 7.0          | 7.2     | 7.5     | 7.9    | 7.2              |
| R56     | 5.7 | 4.5          | 5.8     | 5.9     | 6.2    | 4.3              |
| K57     | 6.2 | 5.0          | 5.9     | 6.5     | 6.1    | 5.2              |
| F58     | 7.0 | 5.1          | 6.7     | 7.2     | 7.6    | 5.7              |
| L59     | 6.7 | 5.2          | 6.6     | —       | 6.6    | 6.3              |
| M60     | 6.9 | 6.0          | 6.3 (E) | 7.1     | 7.3    | 6.6              |
| E61     | 6.4 | 6.3          | 5.9     | 6.7     | 5.9    | 6.2              |
| C62     | 7.7 | 6.4          | 7.2     | 7.6     | 8.8    | 7.3              |
| R63     | 7.5 | 6.7          | 7.2     | 7.4 (Q) | 8.6    | 7.5              |
| N64     | 8.4 | 8.0          | 7.7     | 8.0     | 8.5    | 7.9              |
| S65     | 7.0 | 6.9          | 6.9     | 7.2     | —      | —                |
| P66     | —   | —            | —       | —       | —      | —                |
| V67     | 9.1 | 9.2          | 9.1     | 9.2     | 9.0    | 8.9              |

Residues that form  $\alpha$ -helix upon interacting with eIF4E are shown in bold.
